# Supplementary material for: Theoretical design of solid electrolytes with superb ionic conductivity: alloying effect on Li+ transportation in cubic Li6PA5X chalcogenides
Source: Royal Society of Chemistry journal article supplement (doi:10.1039/c7ta06986c), 2017-01-01
Supplement: c7ta06986c1.pdf [file c7ta06986c1.pdf]

## Supplementary Information

The typical LGPS alloy  $\text{Li}_{10}\text{GeP}_2\text{S}_{12}$  has a tetragonal lattice containing 50 atoms, with the  $\text{P4}_2\text{mc}$  space group (lattice parameters  $a=8.758\text{\AA}$ ,  $c=12.626\text{\AA}$ ). CI-NEB searching for diffusional pathways results in highly different activation barriers along the  $a$ - and  $c$ -axis. **Fig. s1** summarizes the activation barriers along pathways labelled as A, B, C, D in **Fig. s2**. The former two pathways are along the  $c$ -axis, while the latter two are along the  $a$ -axis.

The most likely diffusional channel for  $\text{Li}^+$  along the  $c$ -axis is made of alternating A and B pathways, with the controlling barrier being 0.217 eV. On the other hand, the channel to facilitate  $\text{Li}^+$  migration along the  $a$ -axis is zigzag, consisting of C and D pathways. The dictating barrier along the  $a$ -axis is nearly three times of that along the  $c$ -axis, being 0.615 eV and thus making  $\text{Li}^+$  transportation rather unlikely along the  $a$ -axis. The effective diffusion of  $\text{Li}^+$  in LGPS is therefore one-dimensional only, along the long  $c$ -axis of the materials.

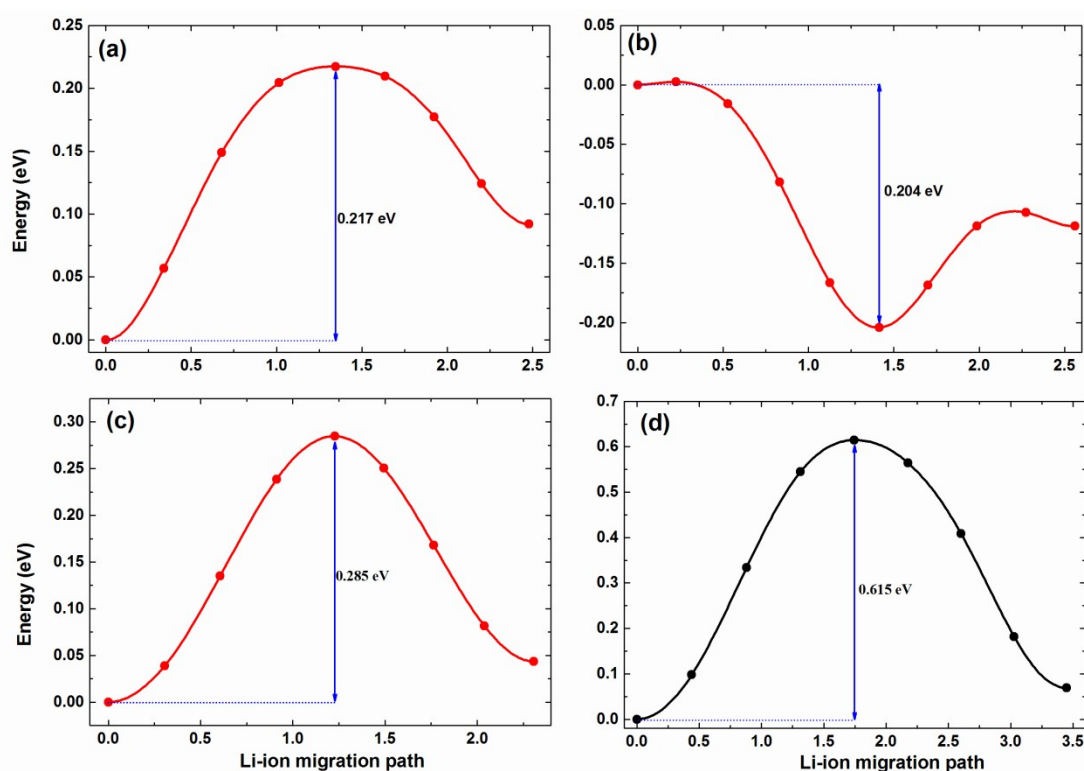

**Fig. s1** Calculated energy barriers for the migration of  $\text{Li}^+$  ions through pathways labelled as A, B, C and D in **Fig. s2**.

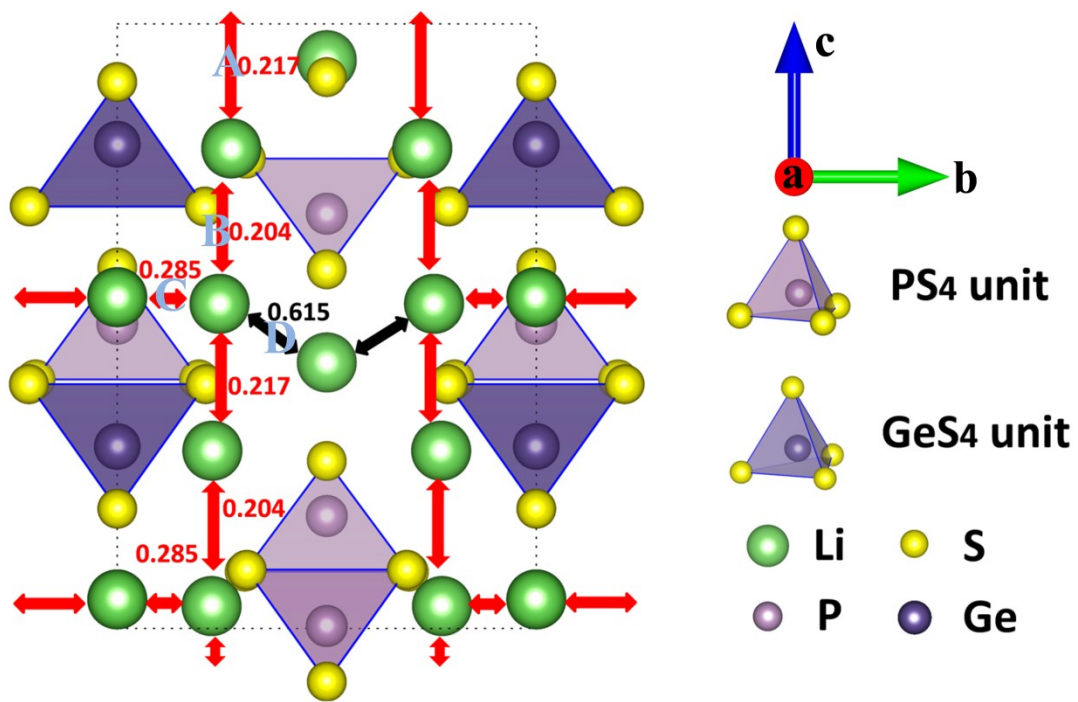

**Fig. s2** Diffusion pathways in LGPS with labels A, B, C and D having activation barriers corresponding to (a), (b), (c) and (d) in **Fig. s1**. Values are associated activation barriers in electron volts.
